# Supplementary material for: Oligonucleotide analogues with locked-amide linkages have therapeutic potential
Source: Research Square preprint supplement (doi:10.21203/rs.3.rs-1542733/v1), 2022-05-04
Supplement: Supplementary file 1 [file dea5ac7797b63f2a8ce31b15.xlsx]

## Sheet: Fig 6a
	Luciferase activity normalised to protein (RLU/mg protein)
			replicate
			1	2	3
		ON202′OMe/17PS	103625	108251	113280
		ON182′OMe/4LAL/13PS	93081.7	99553	96690.3
		ON192′OMe/8LNA/17PS	95371.1	76115.8	68909.6
		ON14DNA/4LAL/13PO	1470.33	1343.07	2168.47
		ON162′OMe/4LAL/13PS	2775.7	2757.95	3230.59
		ON312′OMe/17PS scrambled	1902.28	2344.42	2747.2
		Untreated cells	2275.11	1913.5	1791.25	2595.84	1813.33	1039.38
	Fold-increase over untreated
			replicate
			1	2	3
		ON202′OMe/17PS	53.404	55.8324	58.4726
		ON182′OMe/4LAL/13PS	47.8686	51.2661	49.7631
		ON192′OMe/8LNA/17PS	49.0706	38.9613	35.178
		ON14DNA/4LAL/13PO	-0.228065	-0.294879	0.138464
		ON162′OMe/4LAL/13PS	0.457263	0.447946	0.696085
		ON312′OMe/17PS scrambled	-0.00128708	0.230841	0.4423

## Sheet: Fig 6b
	Luciferase activity normalised to protein (RLU/mg protein)
		ON202′OMe/17PS			ON182′OMe/4LAL/13PS			ON192′OMe/8LNA/17PS
	6.25 nM	7347.15	6593.69	5068.02	16061.3	15838.4	14534.7	10710.6	9260.64	9034.64
	12.5 nM	9747.33	14286.7	12306.6	28569.7	24628.8	26631.3	16226.1	15656.3	12817.1
	25 nM	17027.2	18674.7	24205.9	34681.9	30910	47008.1	28001.9	23572.4	21960.5
	50 nM	49964.7	45591.9	53959.5	53613.8	57314.1	70002.4	49857.1	41862.2	34361.7
	untreated	2275.11	1913.5	1791.25	2595.84	1813.33	1039.38
	Fold-increase over untreated
		ON202′OMe/17PS			ON182′OMe/4LAL/13PS			ON192′OMe/8LNA/17PS
	6.25 nM	2.85731	2.46174	1.66075	7.43232	7.31526	6.63083	4.62314	3.8619	3.74325
	12.5 nM	4.11742	6.50064	5.46107	13.9993	11.9303	12.9816	7.51882	7.21969	5.72905
	25 nM	7.9394	8.80434	11.7083	17.2082	15.228	23.6796	13.7012	11.3757	10.5294
	50 nM	25.2319	22.9361	27.3291	27.1477	29.0903	35.7518	25.1753	20.978	17.0402

## Sheet: Fig 6c and S24
	Luciferase activity normalised to protein (RLU/mg protein)
		ON182′OMe/4LAL/13PS			ON202′OMe/17PS			ON192′OMe/8LNA/17PS			ON312′OMe/17PS scrambled			ON162′OMe/4LAL/13PO
	5 μM	3610.88	5370.14	4032.81	1346.03	1902.17	1737.15	846.674	965.704	881.792	655.067	786.574	1449.97	954.693	906.014	1087.58
	10 μM	6999.98	7884.71	8218.82	2087.96	1881.75	2865.3	861.579	1022.45	1162.98	758.739	1007.6	1102.92	925.061	1086.35	1280.49
	20 μM	11133.9	9634.67	13418.1	2764.3	3264.82	3181.93	1086.68	1269.44	1234.76	764.243	855.694	886.433	1053.68	1162.02	1165.11
	Untreated	800.285	651.065	936.874	910.342	932.225	954.108
	Fold-increase over untreated
		ON182′OMe/4LAL/13PS			ON202′OMe/17PS			ON192′OMe/8LNA/17PS			ON312′OMe/17PS scrambled			ON162′OMe/4LAL/13PO
	5 μM	3.17853	5.21436	3.66679	0.557637	1.2012	1.01024	-0.0202232	0.117519	0.0204156	-0.241952	-0.0897713	0.677919	0.104777	0.0484455	0.258549
	10 μM	7.10042	8.12423	8.51088	1.4162	1.17757	2.31575	-0.00297499	0.183187	0.345806	-0.121982	0.166	0.276309	0.0704868	0.257128	0.48179
	20 μM	11.8842	10.1493	14.5275	2.19887	2.77807	2.68215	0.257518	0.469003	0.428876	-0.115613	-0.00978515	0.0257862	0.219327	0.344696	0.348274

## Sheet: Fig 6d
	ASO / nM	ON20 2′OMe/17PS			ON18 2′OMe/4LAL/13PS			ON19 2′OMe/8LNA/17PS			ON31 2′OMe/17PS scrambled
	400	0.179	0.391	0.408	0.818	0.791	0.68	0.519	0.572	0.518	0.189	0.245	0.281
	200	0.875	0.7	0.774	0.897	1.065	1.002	0.634	0.629	0.739	0.553	0.699	0.633
	100	1.172	1.168	1.086	1.195	1.343	1.377	0.922	0.971	1.037	1.122	1.111	1.036
	50	1.433	1.321	1.394	1.309	1.356	1.386	1.058	1.068	1.22	1.272	1.242	1.348
	25	1.544	1.469	1.378	1.395	1.547	1.459	1.339	1.355	1.32	1.307	1.574	1.404
	12.6	1.612	1.587	1.459	1.625	1.486	1.395	1.414	1.407	1.348	1.286	1.504	1.453
	6.25	1.605	1.45	1.544	1.48	1.545	1.406	1.549	1.458	1.467	1.375	1.54	1.478
		Untreated Cells
		1.667	1.652	1.437	1.439	1.419	1.436	1.562	1.416	1.539	1.601	1.568	1.493

## Sheet: Fig S25
		400 nM			200 nM			100 nM			50 nM			25 nM			12.5 nM			6.25 nM
	ON202′OMe/17PS	1.535	-48.7282	80.4824	283.377	151.798	220.482	335.745	437.325	414.693	368.64	377.851	486.535	486.272	498.64	555.745	612.061	499.693	511.272	572.324	560.482	519.167
	ON182′OMe/4LAL/13PS	174.43	289.43	166.272	291.272	427.588	364.167	381.798	406.798	409.167	439.956	369.43	483.903	429.693	589.167	467.851	543.377	637.588	520.482	426.009	548.903	562.324
	ON192′OMe/8LNA/17PS	254.959	230.198	250.674	289.721	257.579	311.864	408.293	320.436	339.245	287.341	341.626	319.959	519.245	318.055	412.579	448.531	299.245	503.769	369.007	450.674	476.388
	ON312′OMe/PS scrambled	94.4833	38.2929	59.0071	203.055	230.912	213.531	345.198	362.102	342.102	356.388	402.341	437.817	367.817	474.245	315.674	376.388	385.674	386.388	394.721	475.912	514.245
		untreated
		619.43	611.272	559.43	488.903	594.693	448.64
